# Supplementary material
Source: Research Square preprint supplement (doi:10.21203/rs.3.rs-8763414/v1)
Supplement: Supplementary file 1 [file 5f4d0e2aec72818a273dbc20.docx]

Supplemental Information

**S1. Experimental Prompts for Experiments 1 and 2**

*Experiment 1 prompt*

请在句子的下划线处填入一个词，且只能从【全部、大多数、多数、少数、极少数、没有、一些】中选择。除填补该处外，不得修改句子的任何其他部分。完成后仅输出所填词，不添加解释、标点或多余文字。

Please fill in the blank in the sentence with only one word chosen from the following options: [All, The great majority, Most, Few, Very few, None, Some]. Do not modify any other part of the sentence. After completing, output only the word you selected, without explanation, punctuation, or any extra text.

*Experiment 2 prompt*

你将阅读一个情境描述。该描述已经明确说明了事情的真实情况。接下来你会看到某人在该情境中说出的一句话。你的任务是判断：在该具体情境下，这句话作为一种回应是否可以被接受。请不要假设任何未在情境中明确给出的信息。请只输出其中一个选项，不要输出解释，也不要添加任何其他文字或标点符号。

是（表示“可接受”）

否（表示“不可接受”）

You will read a description of a situation. The description explicitly states the true state of affairs. Next, you will see a sentence spoken by someone in that situation. Your task is to judge whether the sentence can be considered an acceptable response in this specific situation. Do not assume any information that is not explicitly stated in the situation. Please output only one option, and do not provide any explanation or add any other text or punctuation.

Yes (indicating “acceptable”)

No (indicating “unacceptable”)

**S2. Example Stimuli for Experiments 1 and 2**

*Example Experimental Scenarios from Experiment 1*

**1. Fact-Most / No-FTA:**

刘乐带弟弟小彬一起参加了公司临时安排的部门团建活动。结束后，小彬向刘乐询问有多少同事抱怨了这次活动。刘乐知道多数同事抱怨了，她对小彬说：“____。”

Liu Le took her younger brother Xiaobin to a department team-building activity that was temporarily arranged by the company. After the event, Xiaobin asked Liu Le how many colleagues had complained about the activity. Liu Le knew that most colleagues had complained, and she said to Xiaobin, “____.”

**2. Fact-All / No-FTA:**

质检员小明刚刚查验完供货商邮寄过来的一箱新鲜桃子。随后，同事询问小明有多少桃子坏了。小明发现全部桃子都烂掉了，他对同事说：“____。”

The quality inspector Xiaoming had just finished inspecting a box of fresh peaches sent by a supplier. A colleague then asked Xiaoming how many peaches had gone bad. Xiaoming found that all of the peaches had gone bad, and he said to the colleague, “____.”

**3. Fact-Most / FTA:**

小可给菲菲寄了自己亲手做的酸奶。快递寄到后，小可向菲菲询问有多少酸奶变质了。菲菲发现多数酸奶变质了，为了不让小可难为情，她对小可说：“____。”

Xiaoke sent Feifei some homemade yogurt. After the package arrived, Xiaoke asked Feifei how many of the yogurts had gone bad. Feifei found that most of the yogurts had gone bad. In order not to make Xiaoke feel embarrassed, she said to Xiaoke, “____.”

**4. Fact-All / FTA:**

插花小组评价了小圆首次独立制作的花篮。小圆向插花老师询问有多少学员嫌弃这个花篮。老师知道全部学员都嫌弃，想到小圆脸皮非常薄，她对小圆说：“____”。

The flower arranging group evaluated Xiaoyuan’s first independently made flower basket. Xiaoyuan asked the instructor how many students disliked the basket. Knowing that all of the students disliked it, and considering that Xiaoyuan was very sensitive, the instructor said to Xiaoyuan, “____.”

*Example Experimental Scenarios from Experiment 2*

**1. Fact-Most / No-FTA – Hedge**

小雪听到一个博主读了一篇俄文文章，就想让学姐帮忙鉴定博主的发音。她向学姐询问这其中有多少词的发音不规范。学姐听到多数词发音不规范，她对小雪说：“一些不规范。”

Xiaoxue heard a content creator read a Russian article and wanted her senior to check the creator’s pronunciation. She asked her senior how many words were pronounced incorrectly. Hearing that most of the words were pronounced incorrectly, her senior said to Xiaoxue, “Some are incorrect.”

**2. Fact-All / No-FTA – Hedge**

股东大会上，小顾看到了一个机器人正在向现场观众演示公司的新产品。结束后，她问同事刚刚有多少演示步骤出错了。同事发现全部步骤都出错了，她对小顾说：“一些出错了。”

Xiaogu saw a robot demonstrating the company’s new product to the audience at the shareholders’ meeting. After the demonstration, she asked a colleague how many steps had gone wrong. The colleague found that all the steps had gone wrong and said to Xiaogu, “Some went wrong.”

**3. Fact-Most / FTA – Hedge**

莹莹在入职仪式上表演了一段舞蹈。结束后，她向前辈小林询问有多少领导反感这段舞蹈。小林知道多数领导反感，他不想莹莹尴尬，他对莹莹说：“一些反感。”

Yingying performed a dance at the company’s onboarding ceremony. Afterward, she asked her senior Xiaolin how many leaders disliked the performance. Xiaolin knew that most of the leaders disliked it, and not wanting Yingying to feel embarrassed, he said to her, “Some disliked it.”

**4. Fact-All / FTA – Hedge**

同事特意为小红的派对制作了一箱饼干。派对结束后，同事询问小红这些饼干剩下了多少。小红看到全部饼干都剩下了，她不想同事感到难堪，她对同事说：“一些剩下了。”

A colleague specially made a box of cookies for Xiaohong’s party. After the party, the colleague asked Xiaohong how many cookies were left. Seeing that all of the cookies were left, and not wanting the colleague to feel embarrassed, she said to the colleague, “Some are left.”

**5. Fact-Most / No-FTA – Direct**

老杜在办案时缴获了玉石，他请来物证科的同事鉴定。他向专家魏师傅请教其中有多少是赝品。魏师傅知道多数造假了，他对老杜说：“多数造假了。”

Du seized some jade during a case and invited colleagues from the evidence department to examine it. He asked the expert Master Wei how many pieces were fake. Master Wei knew that most of them were fake and said to Du, “Most are fake.”

**6. Fact-All / No-FTA – Direct**

小芳是迎宾员，主要负责把主办方邀请的乐评人带到嘉宾席。演出当天，小芳向王助理询问有多少乐评人缺席了。王助理知道全部乐评人都缺席了，他对小芳说：“全部缺席了。”

Xiaofang is a usher, mainly responsible for escorting the music critics invited by the organizers to the guest seats. On the day of the performance, she asked Assistant Wang how many music critics were absent. Assistant Wang knew that all of the critics were absent and said to Xiaofang, “All were absent.”

**7. Fact-Most / FTA – Direct**

周末小琴在家招待了梦姐和其他同事。结束后，小琴向梦姐询问有多少同事对这次招待不满。梦姐知道多数同事不满，她不想小琴面上无光，她对小琴说：“多数不满。”

Xiaoqin hosted Mengjie and other colleagues at her home over the weekend. Afterward, she asked Mengjie how many colleagues were dissatisfied with the gathering. Mengjie knew that most of the colleagues were dissatisfied, but not wanting Xiaoqin to feel embarrassed, she said to Xiaoqin, “Most were dissatisfied.”

**8. Fact-All / FTA – Direct**

奶奶误把玲玲的羊绒大衣水洗了。奶奶向玲玲询问有多少大衣洗坏了。玲玲发现全部大衣都洗坏了，她不想奶奶太自责，她对奶奶说：“全部洗坏了。”

Grandma accidentally machine-washed Lingling’s cashmere coat. She asked Lingling how many coats were ruined. Lingling saw that all of the coats were ruined, but not wanting Grandma to feel too guilty, she said to her, “All were ruined.”

**Table S1**

*Experiment 1 quantifier choice distributions by condition and source.*

| **Source** | **Face Threat** | **Factual State** | **Response** | **n** | **p** | **se** |
| --- | --- | --- | --- | --- | --- | --- |
| Human | Face-threatening | most | no | 31 | .081 | 0.014 |
| Human | Face-threatening | most | very few | 52 | .135 | 0.017 |
| Human | Face-threatening | most | few | 123 | .320 | 0.024 |
| Human | Face-threatening | most | some | 171 | .445 | 0.025 |
| Human | Face-threatening | most | most | 7 | .018 | 0.007 |
| Human | Face-threatening | most | The great majority | 0 | —— | —— |
| Human | Face-threatening | most | all | 0 | —— | —— |
| Human | Face-threatening | all | no | 24 | .062 | 0.012 |
| Human | Face-threatening | all | very few | 45 | .117 | 0.016 |
| Human | Face-threatening | all | few | 79 | .206 | 0.021 |
| Human | Face-threatening | all | some | 180 | .469 | 0.025 |
| Human | Face-threatening | all | most | 38 | .099 | 0.015 |
| Human | Face-threatening | all | The great majority | 10 | .026 | 0.008 |
| Human | Face-threatening | all | all | 8 | .021 | 0.007 |
| Human | Neutral | most | no | 1 | .003 | 0.003 |
| Human | Neutral | most | very few | 3 | .008 | 0.004 |
| Human | Neutral | most | few | 6 | .016 | 0.006 |
| Human | Neutral | most | some | 33 | .086 | 0.014 |
| Human | Neutral | most | most | 313 | .815 | 0.020 |
| Human | Neutral | most | The great majority | 24 | .062 | 0.012 |
| Human | Neutral | most | all | 4 | .010 | 0.005 |
| Human | Neutral | all | no | 2 | .005 | 0.004 |
| Human | Neutral | all | very few | 0 | —— | —— |
| Human | Neutral | all | few | 2 | .005 | 0.004 |
| Human | Neutral | all | some | 13 | .034 | 0.009 |
| Human | Neutral | all | most | 18 | .047 | 0.011 |
| Human | Neutral | all | The great majority | 28 | .073 | 0.013 |
| Human | Neutral | all | all | 321 | .836 | 0.019 |
| DeepSeek-R1 | Face-threatening | most | no | 9 | .028 | 0.009 |
| DeepSeek-R1 | Face-threatening | most | very few | 24 | .075 | 0.015 |
| DeepSeek-R1 | Face-threatening | most | few | 183 | .572 | 0.028 |
| DeepSeek-R1 | Face-threatening | most | some | 103 | .322 | 0.026 |
| DeepSeek-R1 | Face-threatening | most | most | 0 | —— | —— |
| DeepSeek-R1 | Face-threatening | most | The great majority | 1 | .003 | 0.003 |
| DeepSeek-R1 | Face-threatening | most | all | 0 | —— | —— |
| DeepSeek-R1 | Face-threatening | all | no | 52 | .163 | 0.021 |
| DeepSeek-R1 | Face-threatening | all | very few | 51 | .159 | 0.020 |
| DeepSeek-R1 | Face-threatening | all | few | 62 | .194 | 0.022 |
| DeepSeek-R1 | Face-threatening | all | some | 150 | .469 | 0.028 |
| DeepSeek-R1 | Face-threatening | all | most | 0 | —— | —— |
| DeepSeek-R1 | Face-threatening | all | The great majority | 4 | .013 | 0.006 |
| DeepSeek-R1 | Face-threatening | all | all | 1 | .003 | 0.003 |
| DeepSeek-R1 | Neutral | most | no | 0 | —— | —— |
| DeepSeek-R1 | Neutral | most | very few | 0 | —— | —— |
| DeepSeek-R1 | Neutral | most | few | 0 | —— | —— |
| DeepSeek-R1 | Neutral | most | some | 3 | .009 | 0.005 |
| DeepSeek-R1 | Neutral | most | most | 317 | .991 | 0.005 |
| DeepSeek-R1 | Neutral | most | The great majority | 0 | —— | —— |
| DeepSeek-R1 | Neutral | most | all | 0 | —— | —— |
| DeepSeek-R1 | Neutral | all | no | 0 | —— | —— |
| DeepSeek-R1 | Neutral | all | very few | 0 | —— | —— |
| DeepSeek-R1 | Neutral | all | few | 0 | —— | —— |
| DeepSeek-R1 | Neutral | all | some | 0 | —— | —— |
| DeepSeek-R1 | Neutral | all | most | 0 | —— | —— |
| DeepSeek-R1 | Neutral | all | The great majority | 9 | .028 | 0.009 |
| DeepSeek-R1 | Neutral | all | all | 311 | .972 | 0.009 |
| DeepSeek-V3.2 | Face-threatening | most | no | 0 | —— | —— |
| DeepSeek-V3.2 | Face-threatening | most | very few | 0 | —— | —— |
| DeepSeek-V3.2 | Face-threatening | most | few | 8 | .025 | 0.009 |
| DeepSeek-V3.2 | Face-threatening | most | some | 300 | .938 | 0.014 |
| DeepSeek-V3.2 | Face-threatening | most | most | 2 | .006 | 0.004 |
| DeepSeek-V3.2 | Face-threatening | most | The great majority | 3 | .009 | 0.005 |
| DeepSeek-V3.2 | Face-threatening | most | all | 7 | .022 | 0.008 |
| DeepSeek-V3.2 | Face-threatening | all | no | 0 | —— | —— |
| DeepSeek-V3.2 | Face-threatening | all | very few | 0 | —— | —— |
| DeepSeek-V3.2 | Face-threatening | all | few | 5 | .016 | 0.007 |
| DeepSeek-V3.2 | Face-threatening | all | some | 306 | .956 | 0.011 |
| DeepSeek-V3.2 | Face-threatening | all | most | 0 | —— | —— |
| DeepSeek-V3.2 | Face-threatening | all | The great majority | 0 | —— | —— |
| DeepSeek-V3.2 | Face-threatening | all | all | 9 | .028 | 0.009 |
| DeepSeek-V3.2 | Neutral | most | no | 0 | —— | —— |
| DeepSeek-V3.2 | Neutral | most | very few | 0 | —— | —— |
| DeepSeek-V3.2 | Neutral | most | few | 1 | .003 | 0.003 |
| DeepSeek-V3.2 | Neutral | most | some | 57 | .178 | 0.021 |
| DeepSeek-V3.2 | Neutral | most | most | 261 | .816 | 0.022 |
| DeepSeek-V3.2 | Neutral | most | The great majority | 1 | .003 | 0.003 |
| DeepSeek-V3.2 | Neutral | most | all | 0 | —— | —— |
| DeepSeek-V3.2 | Neutral | all | no | 1 | .003 | 0.003 |
| DeepSeek-V3.2 | Neutral | all | very few | 0 | —— | —— |
| DeepSeek-V3.2 | Neutral | all | few | 0 | —— | —— |
| DeepSeek-V3.2 | Neutral | all | some | 0 | —— | —— |
| DeepSeek-V3.2 | Neutral | all | most | 0 | —— | —— |
| DeepSeek-V3.2 | Neutral | all | The great majority | 0 | —— | —— |
| DeepSeek-V3.2 | Neutral | all | all | 319 | .997 | 0.003 |
| GPT-4o | Face-threatening | most | no | 0 | —— | —— |
| GPT-4o | Face-threatening | most | very few | 0 | —— | —— |
| GPT-4o | Face-threatening | most | few | 15 | .047 | 0.012 |
| GPT-4o | Face-threatening | most | some | 296 | .925 | 0.015 |
| GPT-4o | Face-threatening | most | most | 7 | .022 | 0.008 |
| GPT-4o | Face-threatening | most | The great majority | 2 | .006 | 0.004 |
| GPT-4o | Face-threatening | most | all | 0 | —— | —— |
| GPT-4o | Face-threatening | all | no | 32 | .100 | 0.017 |
| GPT-4o | Face-threatening | all | very few | 2 | .006 | 0.004 |
| GPT-4o | Face-threatening | all | few | 6 | .019 | 0.008 |
| GPT-4o | Face-threatening | all | some | 235 | .734 | 0.025 |
| GPT-4o | Face-threatening | all | most | 8 | .025 | 0.009 |
| GPT-4o | Face-threatening | all | The great majority | 23 | .072 | 0.014 |
| GPT-4o | Face-threatening | all | all | 13 | .041 | 0.011 |
| GPT-4o | Neutral | most | no | 0 | —— | —— |
| GPT-4o | Neutral | most | very few | 0 | —— | —— |
| GPT-4o | Neutral | most | few | 0 | —— | —— |
| GPT-4o | Neutral | most | some | 2 | .006 | 0.004 |
| GPT-4o | Neutral | most | most | 298 | .931 | 0.014 |
| GPT-4o | Neutral | most | The great majority | 20 | .062 | 0.014 |
| GPT-4o | Neutral | most | all | 0 | —— | —— |
| GPT-4o | Neutral | all | no | 2 | .006 | 0.004 |
| GPT-4o | Neutral | all | very few | 0 | —— | —— |
| GPT-4o | Neutral | all | few | 0 | —— | —— |
| GPT-4o | Neutral | all | some | 0 | —— | —— |
| GPT-4o | Neutral | all | most | 0 | —— | —— |
| GPT-4o | Neutral | all | The great majority | 0 | —— | —— |
| GPT-4o | Neutral | all | all | 318 | .994 | 0.004 |

*Note.* Cells report proportions. p values (if present) are two-tailed.

**Table S2**

*Experiment 2 acceptance distributions by condition and source (some vs factual).*

| **Source** | **Face Threat** | **Factual State** | **Statement Type** | **n** | **p** | **se** |
| --- | --- | --- | --- | --- | --- | --- |
| DeepSeek-R1 | Neutral | most | some | 320 | 0.225 | 0.023 |
| DeepSeek-R1 | Neutral | all | some | 320 | 0.078 | 0.015 |
| DeepSeek-R1 | Face-threatening | most | some | 320 | 0.994 | 0.004 |
| DeepSeek-R1 | Face-threatening | all | some | 320 | 0.991 | 0.005 |
| DeepSeek-V3.2 | Neutral | most | some | 320 | 0.541 | 0.028 |
| DeepSeek-V3.2 | Neutral | all | some | 320 | 0.156 | 0.020 |
| DeepSeek-V3.2 | Face-threatening | most | some | 320 | 0.650 | 0.027 |
| DeepSeek-V3.2 | Face-threatening | all | some | 320 | 0.431 | 0.028 |
| GPT-4o | Neutral | most | some | 320 | 0.884 | 0.018 |
| GPT-4o | Neutral | all | some | 320 | 0.441 | 0.028 |
| GPT-4o | Face-threatening | most | some | 320 | 0.997 | 0.003 |
| GPT-4o | Face-threatening | all | some | 320 | 1.000 | 0.000 |
| Human | Neutral | most | some | 192 | 0.578 | 0.036 |
| Human | Neutral | all | some | 192 | 0.359 | 0.035 |
| Human | Face-threatening | most | some | 192 | 0.943 | 0.017 |
| Human | Face-threatening | all | some | 192 | 0.932 | 0.018 |
| DeepSeek-R1 | Neutral | most | factual | 320 | 1.000 | 0.000 |
| DeepSeek-R1 | Neutral | all | factual | 320 | 1.000 | 0.000 |
| DeepSeek-R1 | Face-threatening | most | factual | 320 | 0.966 | 0.010 |
| DeepSeek-R1 | Face-threatening | all | factual | 320 | 0.766 | 0.024 |
| DeepSeek-V3.2 | Neutral | most | factual | 320 | 1.000 | 0.000 |
| DeepSeek-V3.2 | Neutral | all | factual | 320 | 1.000 | 0.000 |
| DeepSeek-V3.2 | Face-threatening | most | factual | 320 | 0.828 | 0.021 |
| DeepSeek-V3.2 | Face-threatening | all | factual | 320 | 0.522 | 0.028 |
| GPT-4o | Neutral | most | factual | 320 | 1.000 | 0.000 |
| GPT-4o | Neutral | all | factual | 320 | 1.000 | 0.000 |
| GPT-4o | Face-threatening | most | factual | 320 | 0.894 | 0.017 |
| GPT-4o | Face-threatening | all | factual | 320 | 0.700 | 0.026 |
| Human | Neutral | most | factual | 192 | 0.938 | 0.017 |
| Human | Neutral | all | factual | 192 | 0.880 | 0.023 |
| Human | Face-threatening | most | factual | 192 | 0.188 | 0.028 |
| Human | Face-threatening | all | factual | 192 | 0.109 | 0.023 |

*Note.* Cells report acceptance rates for the target response type under each condition.

**Table S3**

*Experiment 1 distribution-shape metrics (entropy and Jensen–Shannon divergence).*

| **Source** | **Condition** | **Metric** | **Estimate** | **CI** |
| --- | --- | --- | --- | --- |
| DeepSeek-R1 | Neutral_All | Entropy | 0.20 | [0.099, 0.310] |
| DeepSeek-R1 | Neutral_Most | Entropy | 0.13 | [0.081, 0.200] |
| DeepSeek-R1 | Face-threatening_All | Entropy | 1.37 | [1.248, 1.440] |
| DeepSeek-R1 | Face-threatening_Most | Entropy | 1.04 | [0.956, 1.110] |
| DeepSeek-V3.2 | Neutral_All | Entropy | 0.10 | [0.081, 0.130] |
| DeepSeek-V3.2 | Neutral_Most | Entropy | 0.57 | [0.359, 0.700] |
| DeepSeek-V3.2 | Face-threatening_All | Entropy | 0.28 | [0.081, 0.470] |
| DeepSeek-V3.2 | Face-threatening_Most | Entropy | 0.37 | [0.081, 0.650] |
| GPT-4o | Neutral_All | Entropy | 0.11 | [0.081, 0.160] |
| GPT-4o | Neutral_Most | Entropy | 0.34 | [0.201, 0.470] |
| GPT-4o | Face-threatening_All | Entropy | 1.02 | [0.708, 1.260] |
| GPT-4o | Face-threatening_Most | Entropy | 0.39 | [0.237, 0.530] |
| Human | Neutral_All | Entropy | 0.69 | [0.473, 0.880] |
| Human | Neutral_Most | Entropy | 0.75 | [0.477, 0.980] |
| Human | Face-threatening_All | Entropy | 1.53 | [1.315, 1.650] |
| Human | Face-threatening_Most | Entropy | 1.30 | [1.120, 1.420] |
| DeepSeek-R1 | Neutral_All | JS | 0.03 | [0.014, 0.060] |
| DeepSeek-R1 | Neutral_Most | JS | 0.05 | [0.021, 0.090] |
| DeepSeek-R1 | Face-threatening_All | JS | 0.05 | [0.026, 0.100] |
| DeepSeek-R1 | Face-threatening_Most | JS | 0.04 | [0.017, 0.080] |
| DeepSeek-V3.2 | Neutral_All | JS | 0.05 | [0.028, 0.080] |
| DeepSeek-V3.2 | Neutral_Most | JS | 0.03 | [0.010, 0.070] |
| DeepSeek-V3.2 | Face-threatening_All | JS | 0.18 | [0.133, 0.250] |
| DeepSeek-V3.2 | Face-threatening_Most | JS | 0.19 | [0.124, 0.290] |
| GPT-4o | Neutral_All | JS | 0.05 | [0.028, 0.080] |
| GPT-4o | Neutral_Most | JS | 0.03 | [0.012, 0.060] |
| GPT-4o | Face-threatening_All | JS | 0.11 | [0.075, 0.180] |
| GPT-4o | Face-threatening_Most | JS | 0.17 | [0.111, 0.250] |

*Note.* Entropy is computed over the 7-option response distribution; JS divergence quantifies deviation from baseline.

**Table S4**

*Experiment 2 item-level correlations between human cost indicators and LLM cost proxies.*

| **Face Threat** | **Factual State** | **Human Metric** | **Model Metric** | ***r*** | **CI** | **p** |
| --- | --- | --- | --- | --- | --- | --- |
| Neutral | Most | logContextRT | R1_logTokens | 0.13 | [-0.23, 0.46] | .467 |
| Neutral | Most | logContextRT | V3.2_logProb | 0.21 | [-0.15, 0.52] | .255 |
| Neutral | Most | logContextRT | 4o_logProb | 0.16 | [-0.20, 0.48] | .376 |
| Neutral | Most | logJudgmentRT | R1_logTokens | -0.2 | [-0.51, 0.16] | .282 |
| Neutral | Most | logJudgmentRT | V3.2_logProb | 0.06 | [-0.29, 0.40] | .738 |
| Neutral | Most | logJudgmentRT | 4o_logProb | -0.18 | [-0.50, 0.18] | .318 |
| Neutral | Most | logTotalRT | R1_logTokens | -0.02 | [-0.36, 0.33] | .931 |
| Neutral | Most | logTotalRT | V3.2_logProb | 0.3 | [-0.06, 0.59] | .096 |
| Neutral | Most | logTotalRT | 4o_logProb | 0.07 | [-0.28, 0.41] | .691 |
| Neutral | Most | AcceptRate | R1_logTokens | 0.44 | [0.11, 0.69] | .011 |
| Neutral | Most | AcceptRate | V3.2_logProb | -0.33 | [-0.61, 0.02] | .063 |
| Neutral | Most | AcceptRate | 4o_logProb | 0.26 | [-0.10, 0.56] | .150 |
| Neutral | All | logContextRT | R1_logTokens | 0.07 | [-0.28, 0.41] | .688 |
| Neutral | All | logContextRT | V3.2_logProb | -0.06 | [-0.40, 0.29] | .731 |
| Neutral | All | logContextRT | 4o_logProb | -0.21 | [-0.52, 0.15] | .256 |
| Neutral | All | logJudgmentRT | R1_logTokens | 0.17 | [-0.19, 0.49] | .343 |
| Neutral | All | logJudgmentRT | V3.2_logProb | -0.27 | [-0.56, 0.09] | .142 |
| Neutral | All | logJudgmentRT | 4o_logProb | -0.1 | [-0.43, 0.26] | .587 |
| Neutral | All | logTotalRT | R1_logTokens | 0.1 | [-0.25, 0.44] | .573 |
| Neutral | All | logTotalRT | V3.2_logProb | -0.18 | [-0.50, 0.18] | .312 |
| Neutral | All | logTotalRT | 4o_logProb | -0.18 | [-0.50, 0.18] | .314 |
| Neutral | All | AcceptRate | R1_logTokens | 0.47 | [0.14, 0.70] | .007 |
| Neutral | All | AcceptRate | V3.2_logProb | -0.2 | [-0.51, 0.16] | .272 |
| Neutral | All | AcceptRate | 4o_logProb | -0.21 | [-0.52, 0.15] | .245 |
| Face-threatening | Most | logContextRT | R1_logTokens | 0.2 | [-0.15, 0.52] | .261 |
| Face-threatening | Most | logContextRT | V3.2_logProb | 0.02 | [-0.33, 0.37] | .911 |
| Face-threatening | Most | logContextRT | 4o_logProb | -0.09 | [-0.42, 0.27] | .626 |
| Face-threatening | Most | logJudgmentRT | R1_logTokens | 0.33 | [-0.02, 0.61] | .064 |
| Face-threatening | Most | logJudgmentRT | V3.2_logProb | -0.04 | [-0.39, 0.31] | .809 |
| Face-threatening | Most | logJudgmentRT | 4o_logProb | -0.18 | [-0.50, 0.18] | .327 |
| Face-threatening | Most | logTotalRT | R1_logTokens | 0.35 | [-0.00, 0.62] | .052 |
| Face-threatening | Most | logTotalRT | V3.2_logProb | -0.01 | [-0.36, 0.34] | .953 |
| Face-threatening | Most | logTotalRT | 4o_logProb | -0.21 | [-0.52, 0.15] | .241 |
| Face-threatening | Most | AcceptRate | R1_logTokens | -0.07 | [-0.41, 0.28] | .691 |
| Face-threatening | Most | AcceptRate | V3.2_logProb | -0.05 | [-0.40, 0.30] | .769 |
| Face-threatening | Most | AcceptRate | 4o_logProb | 0.2 | [-0.16, 0.51] | .281 |
| Face-threatening | All | logContextRT | R1_logTokens | 0.34 | [-0.01, 0.61] | .059 |
| Face-threatening | All | logContextRT | V3.2_logProb | -0.17 | [-0.49, 0.19] | .348 |
| Face-threatening | All | logContextRT | 4o_logProb | 0.02 | [-0.33, 0.37] | .899 |
| Face-threatening | All | logJudgmentRT | R1_logTokens | 0.14 | [-0.22, 0.46] | .454 |
| Face-threatening | All | logJudgmentRT | V3.2_logProb | -0.07 | [-0.41, 0.29] | .708 |
| Face-threatening | All | logJudgmentRT | 4o_logProb | -0.51 | [-0.73, -0.20] | .003 |
| Face-threatening | All | logTotalRT | R1_logTokens | 0.38 | [0.04, 0.65] | .031 |
| Face-threatening | All | logTotalRT | V3.2_logProb | -0.18 | [-0.49, 0.18] | .337 |
| Face-threatening | All | logTotalRT | 4o_logProb | -0.33 | [-0.61, 0.03] | .069 |
| Face-threatening | All | AcceptRate | R1_logTokens | 0.19 | [-0.17, 0.50] | .310 |
| Face-threatening | All | AcceptRate | V3.2_logProb | -0.14 | [-0.47, 0.22] | .430 |
| Face-threatening | All | AcceptRate | 4o_logProb | 0.16 | [-0.20, 0.48] | .387 |

*Note.* Cells report Pearson r.
